# Supplementary material
Source: publisher figshare collection journal article supplement (https://acs.figshare.com/ndownloader/files/4224667)
Supplement: Supplementary file 1 [file 4224667]

# Supporting Information

## Structural Relaxation in the Singlet Excited State of Star-Shaped Oligofluorenes having a Truxene or Isotruxene as a Core

*Mamoru Fujitsuka,<sup>†,\*</sup> Dae Won Cho,<sup>†,‡</sup> Hsin-Hau Huang,<sup>§</sup> Jye-Shane Yang,<sup>§,\*</sup> and Tetsuro Majima<sup>†,\*</sup>*

<sup>†</sup> The Institute of Scientific and Industrial Research (SANKEN), Osaka University, Mihogaoka 8-1, Ibaraki, Osaka 567-0047, Japan, <sup>‡</sup> Konkuk University-Fraunhofer ISE Next Generation Solar Cell Research Center (KFnSC), Konkuk University, Seoul, 143-701, Korea, and <sup>§</sup>Department of Chemistry, National Taiwan University, Taipei, Taiwan 10617

### Details of the calculation of two-photon absorption cross section

Assuming a Gaussian beam profile, the nonlinear absorption coefficient  $\beta$  can be obtained by curve fitting to the observed open-aperture traces ( $T(z)$ ) with the following equation:

$$T(z) = 1 - \frac{\beta I_0 (1 - e^{-\alpha_0 l})}{2\sqrt{2}\alpha_0 (1 + ((z - z_c)/z_0)^2)}$$

where  $\alpha_0$  is the linear absorption coefficient,  $l$  is the sample length,  $z_c$  is the position of the focal plane and  $z_0$  is the diffraction length of the incident beam. After obtaining the nonlinear absorption coefficient

$\beta$ , the two-photon absorption cross section  $\sigma^{(2)}$  of one solute molecule (in units of 1 GM =  $10^{-50}$  cm<sup>4</sup>·s/photon·molecule) can be determined by using the following relationship:

$$\beta = \frac{\sigma^{(2)} N_A d \times 10^{-3}}{h \nu},$$

where  $N_A$  is the Avogadro constant,  $d$  is the concentration of the TPA compound in solution,  $h$  is the Planck constant, and  $\nu$  is the frequency of the incident laser beam. So as to satisfy the condition of  $\alpha_0 l \ll 1$ , which allows the pure two-photon absorption  $\sigma^{(2)}$  values to be determined using a simulation procedure, the two-photon absorption cross-section value of rhodamine 6G was measured as a reference compound; this control was found to exhibit a  $\sigma^{(2)}$  value of 65 GM at 800 nm.

#### Ultrafast fluorescence profiles of TF3.

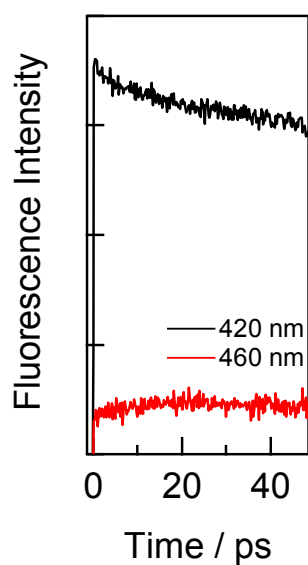

**Figure S1.** Fluorescence profiles of TF3 in toluene measured at 420 and 460 nm.

### Structural change upon excitation to the singlet excited state.

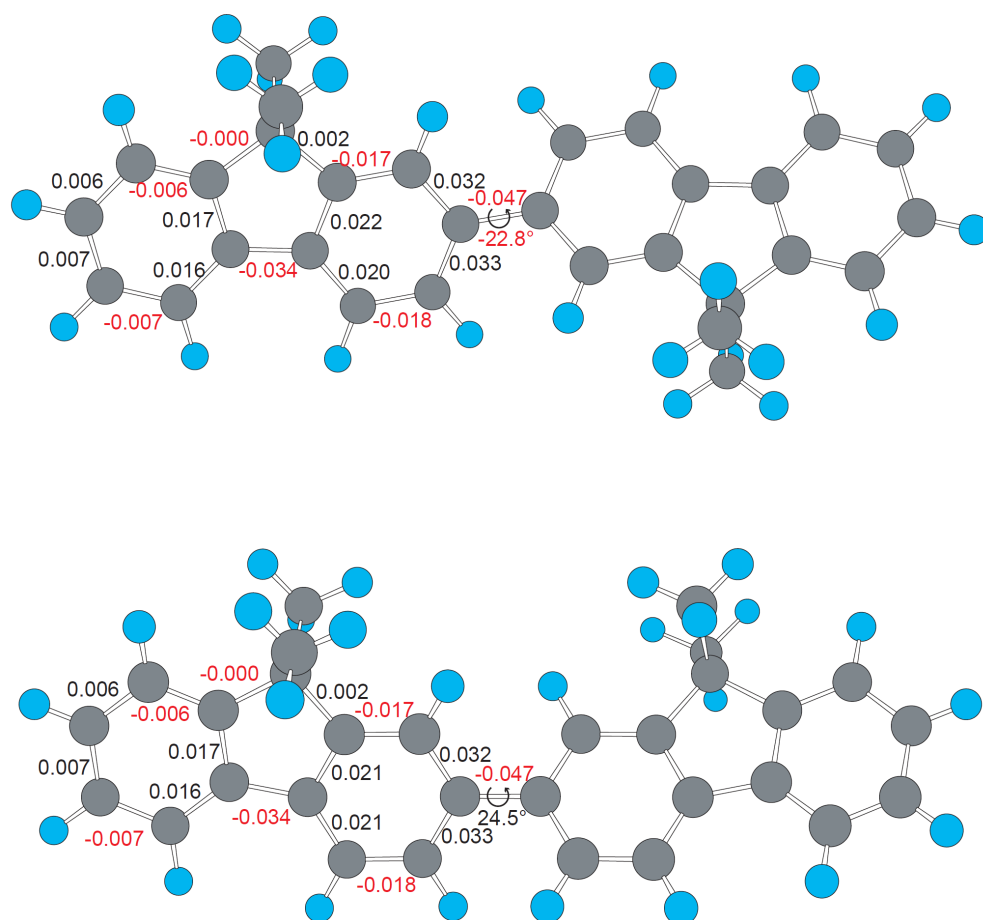

**Figure S2.** Structural (bond length (Å) and dihedral angle) changes of fluorene dimer upon excitation to the singlet excited state (upper: anti-form, lower: syn-form). The molecular structures in the ground and singlet excited states were calculated at B3LYP/6-31G(d) and TD-B3LYP/6-31G(d) levels, respectively. The alkyl groups were reduced to methyl groups.

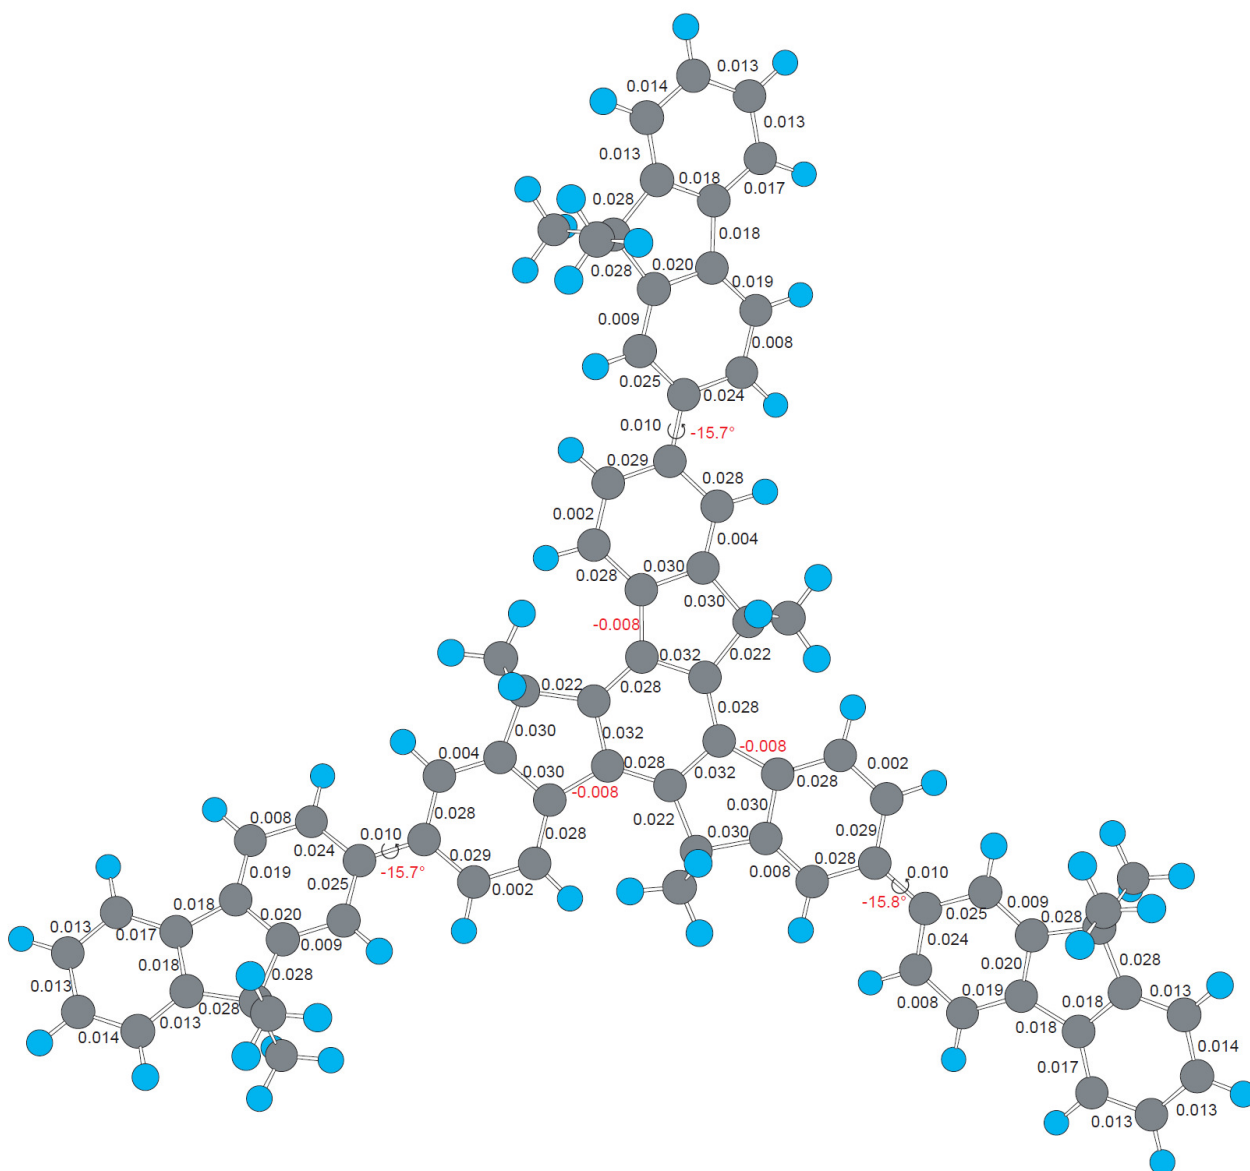

**Figure S3.** Structural (bond length (Å) and dihedral angle) changes of TF1 in all anti-form upon excitation to the singlet excited state. . The molecular structures in the ground and singlet excited states were calculated at B3LYP/6-31G(d) and TD-B3LYP/STO-3G levels, respectively. The alkyl groups were reduced to methyl groups.

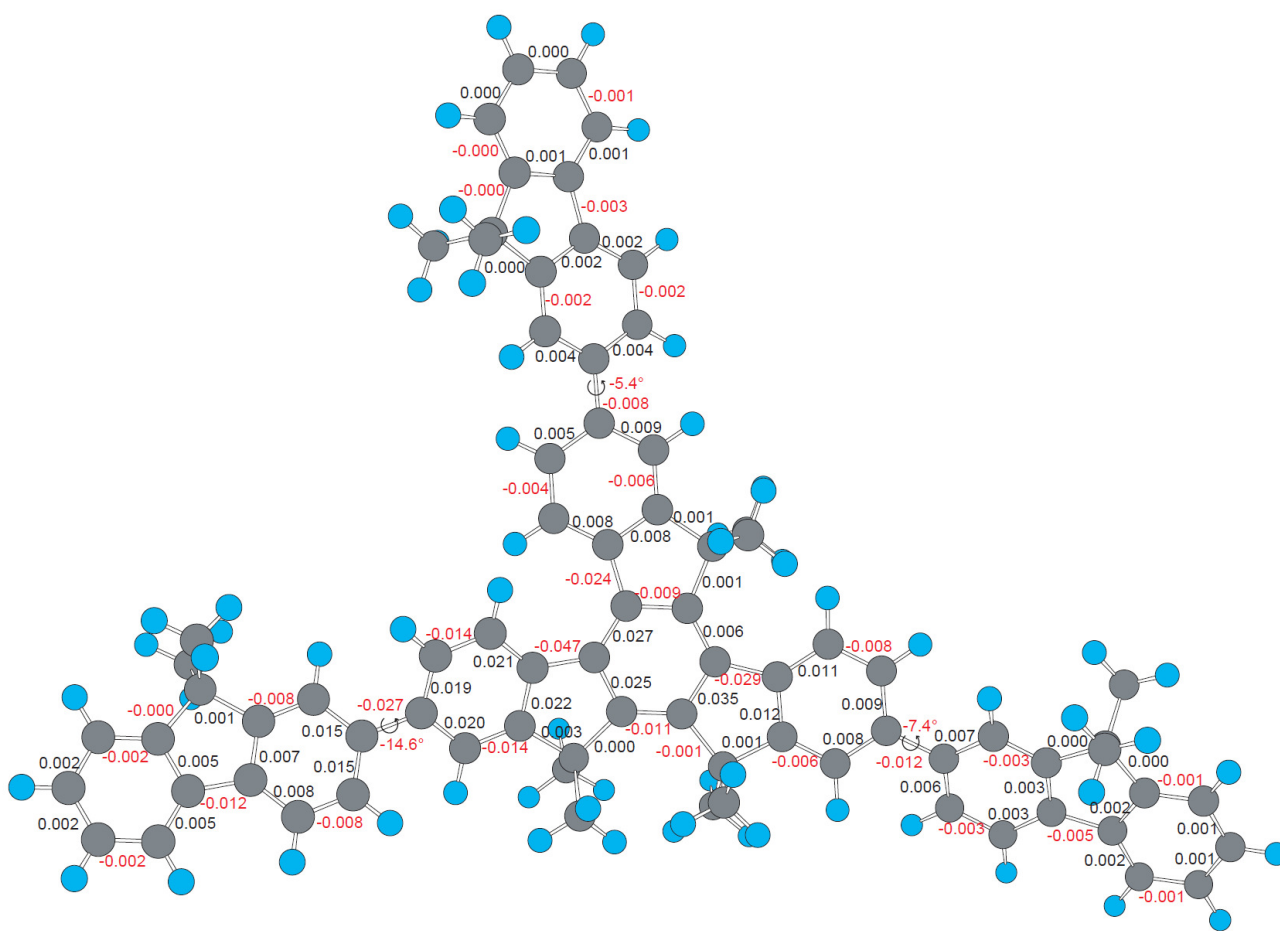

**Figure S4.** Structural (bond length (Å) and dihedral angle) changes of ITF1 in all anti-form upon excitation to the singlet excited state. The molecular structures in the ground and singlet excited states were calculated at B3LYP/6-31G(d) and TD-B3LYP/6-31G(d) levels, respectively. The alkyl groups were reduced to methyl groups.

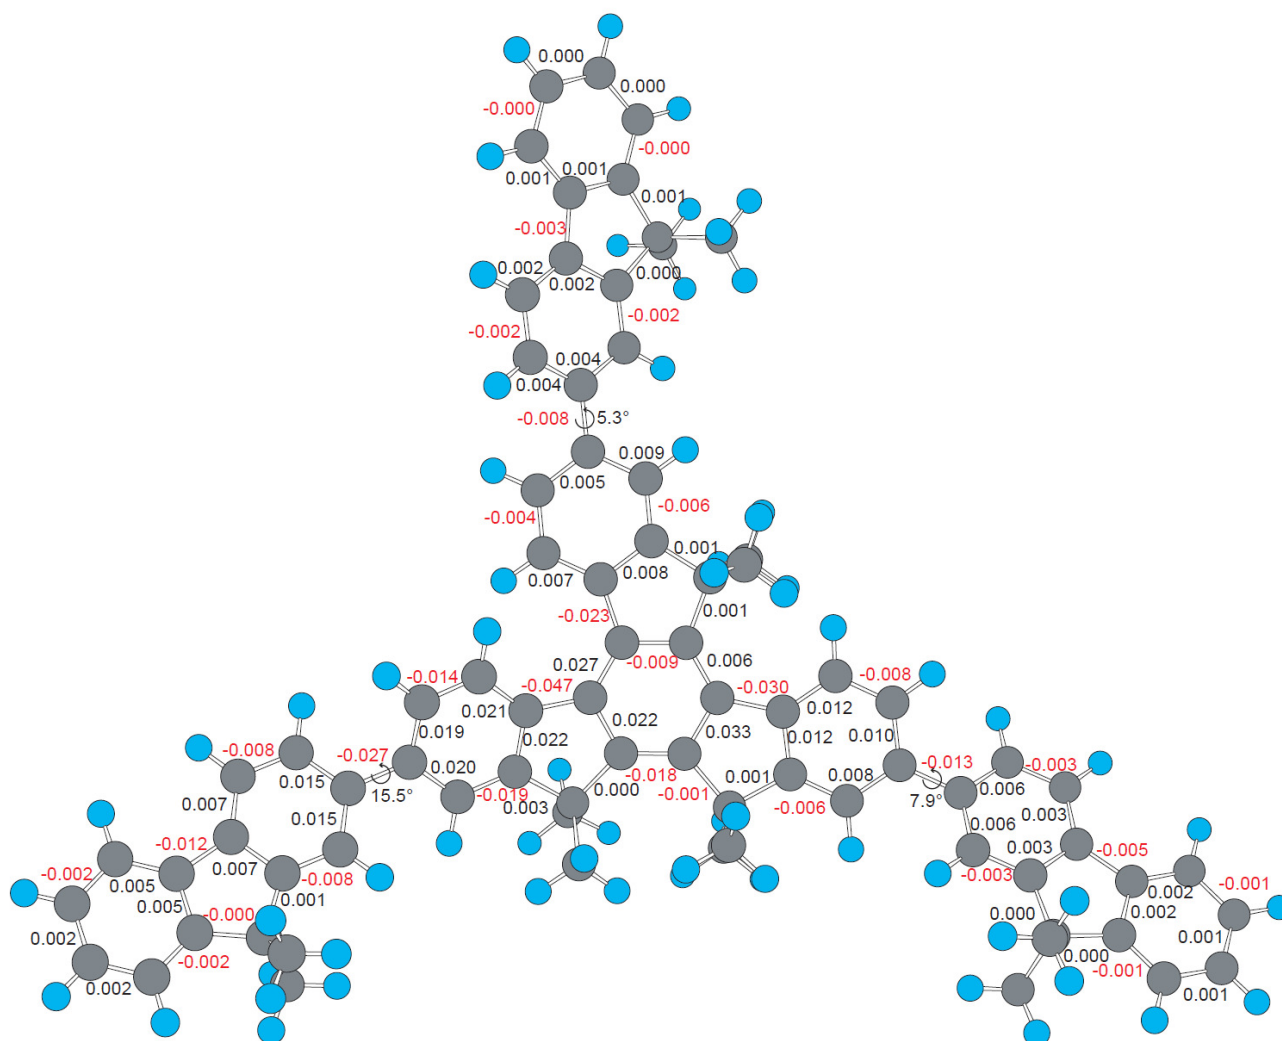

**Figure S5.** Structural (bond length (Å) and dihedral angle) changes of ITF1 in all syn-form upon excitation to the singlet excited state. The molecular structures in the ground and singlet excited state were calculated at B3LYP/6-31G(d) and TD-B3LYP/6-31G(d) levels, respectively. The alkyl groups were reduced to methyl groups.
